# Supplementary material
Source: publisher figshare collection journal article supplement (https://gsajournals.figshare.com/ndownloader/files/26568779)
Supplement: Supplementary file 1 [file 26568779]

## Sheet: Sheet1
Supplementary Table 1: RNAs used for genome annotation.
SRA accession	Species	tissue
SRR617075	Gossypium arboreum	seed
SRR617073	Gossypium arboreum	seed
SRR617068	Gossypium arboreum	seed
SRR617067	Gossypium arboreum	seed
SRR959508	Gossypium arboreum	seedling
SRR2132267	Gossypium davidsonii	roots and leaves
SRR959585	Gossypium herbaceum	seed
SRR10675236	Gossypium herbaceum	10dpa fiber
SRR10675235	Gossypium herbaceum	15dpa fiber
SRR10675234	Gossypium herbaceum	20dpa fiber
SRR10675237	Gossypium herbaceum	5dpa fiber
SRR1174182	Gossypium longicalyx	Leaves
SRR1174179	Gossypium longicalyx	Leaves
SRR6327757	Gossypium longicalyx	stem
SRR6327758	Gossypium longicalyx	flower
SRR6327759	Gossypium longicalyx	leaf
SRR617009	Gossypium raimondii	seed
SRR617011	Gossypium raimondii	seed
SRR617013	Gossypium raimondii	seed
SRR8267554	Gossypium raimondii	Root
SRR8267566	Gossypium raimondii	Stem
SRR8878565	Gossypium raimondii	floral buds
SRR8878526	Gossypium raimondii	Leaf
SRR8878661	Gossypium raimondii	Leaf
SRR8878800	Gossypium raimondii	petals
SRR8878534	Gossypium raimondii	Meristems
SRR8878745	Gossypium raimondii	squares
SRR8267623	Gossypium thurberi	Leaf
SRR8267616	Gossypium thurberi	Root
SRR8267619	Gossypium thurberi	Stem
SRR8267606	Gossypium trilobum	Leaf
SRR8267582	Gossypium trilobum	Root
SRR8267601	Gossypium trilobum	Stem
